# Supplementary figures and images for: Instrumentation issues in implementation science
Source: Springer Nature journal article supplement (doi:10.1186/s13012-014-0118-8), 2014-09-03

Figure 2. A heuristic depicting a conceptualization of a grassroots-driven diffusion process

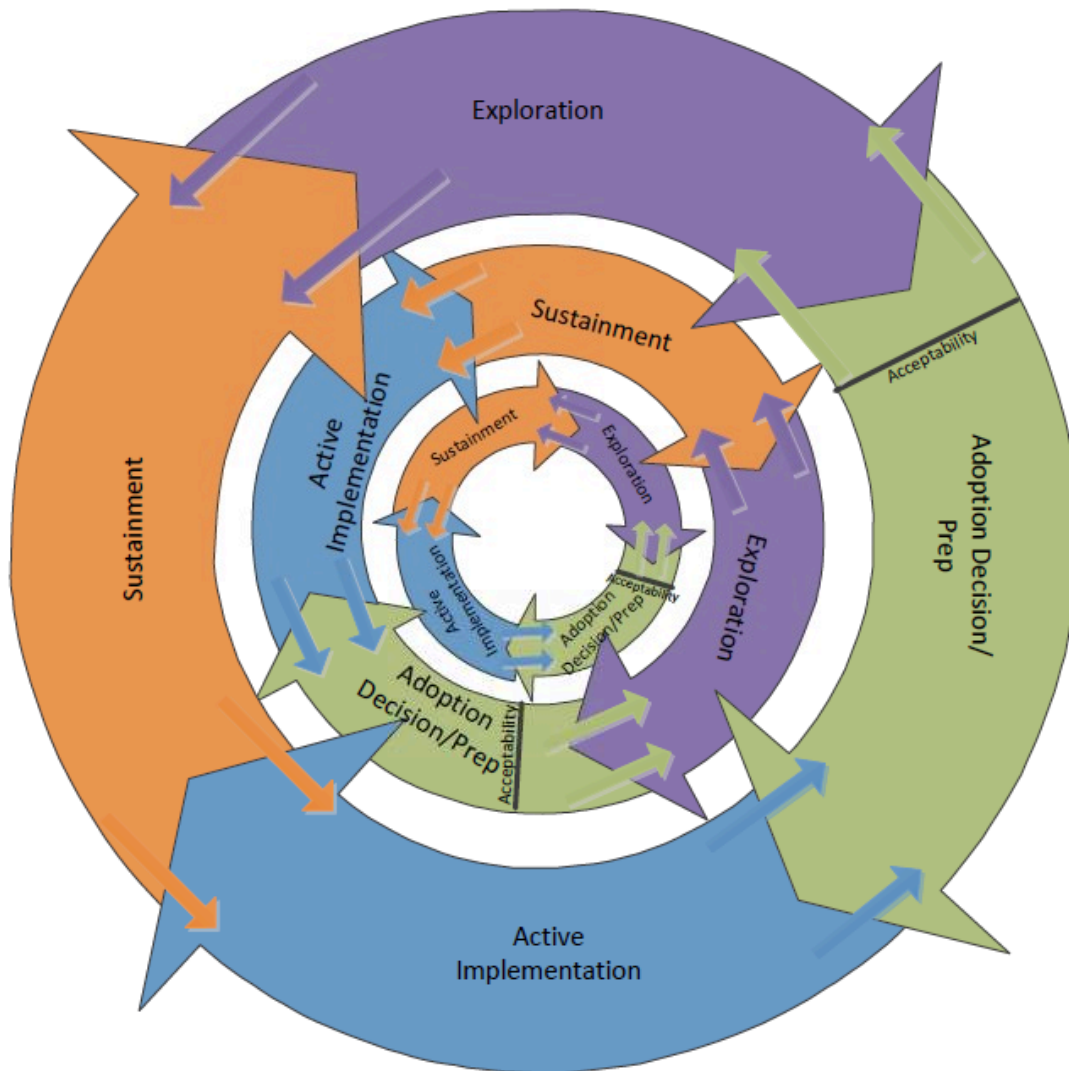

Supplement: MOESM2 [file 9772766]
